# Supplementary material for: Rare Phytocannabinoids Exert Anti-Inflammatory Effects on Human Keratinocytes via the Endocannabinoid System and MAPK Signaling Pathway
Source: MDPI journal article supplement (doi:10.3390/ijms24032721), 2023-02-01
Supplement: s1 [file s1]

# **Rare phytocannabinoids exert anti-inflammatory effects on human keratinocytes via the endocannabinoid system and MAPK signalling pathway**

Daniel Tortolani<sup>1,2#</sup>, Camilla Di Meo<sup>3#</sup>, Sara Standoli<sup>3</sup>, Francesca Ciaramellano<sup>1</sup>, Salam Kadhim<sup>4</sup>, Eric Hsu<sup>4</sup>, Cinzia Rapino<sup>1\*</sup> and Mauro Maccarrone<sup>2,5\*</sup>

<sup>1</sup>*Department of Veterinary Medicine, University of Teramo, Teramo, 64100, Italy*

<sup>2</sup>*European Center for Brain Research (CERC)/Santa Lucia Foundation IRCCS, Rome, 00143, Italy*

<sup>3</sup>*Department of Bioscience and Technology for Food Agriculture and Environment, University of Teramo, Teramo, 64100, Italy*

<sup>4</sup>*InMed Pharmaceuticals Inc., Vancouver BC, V6C 1B4, Canada*

<sup>5</sup>*Department of Biotechnological and Applied Clinical Sciences, University of L'Aquila, 67100 L'Aquila, Italy*

<sup>#</sup>*Equally first authors.*

<sup>\*</sup>*Correspondence: [crapino@unite.it](mailto:crapino@unite.it) (C.R.); [mauro.maccarrone@univaq.it](mailto:mauro.maccarrone@univaq.it) (M.M.)*

## **Supplementary materials**

*Dose-response curves of tested interleukins and representative images of phospho-kinase arrays*

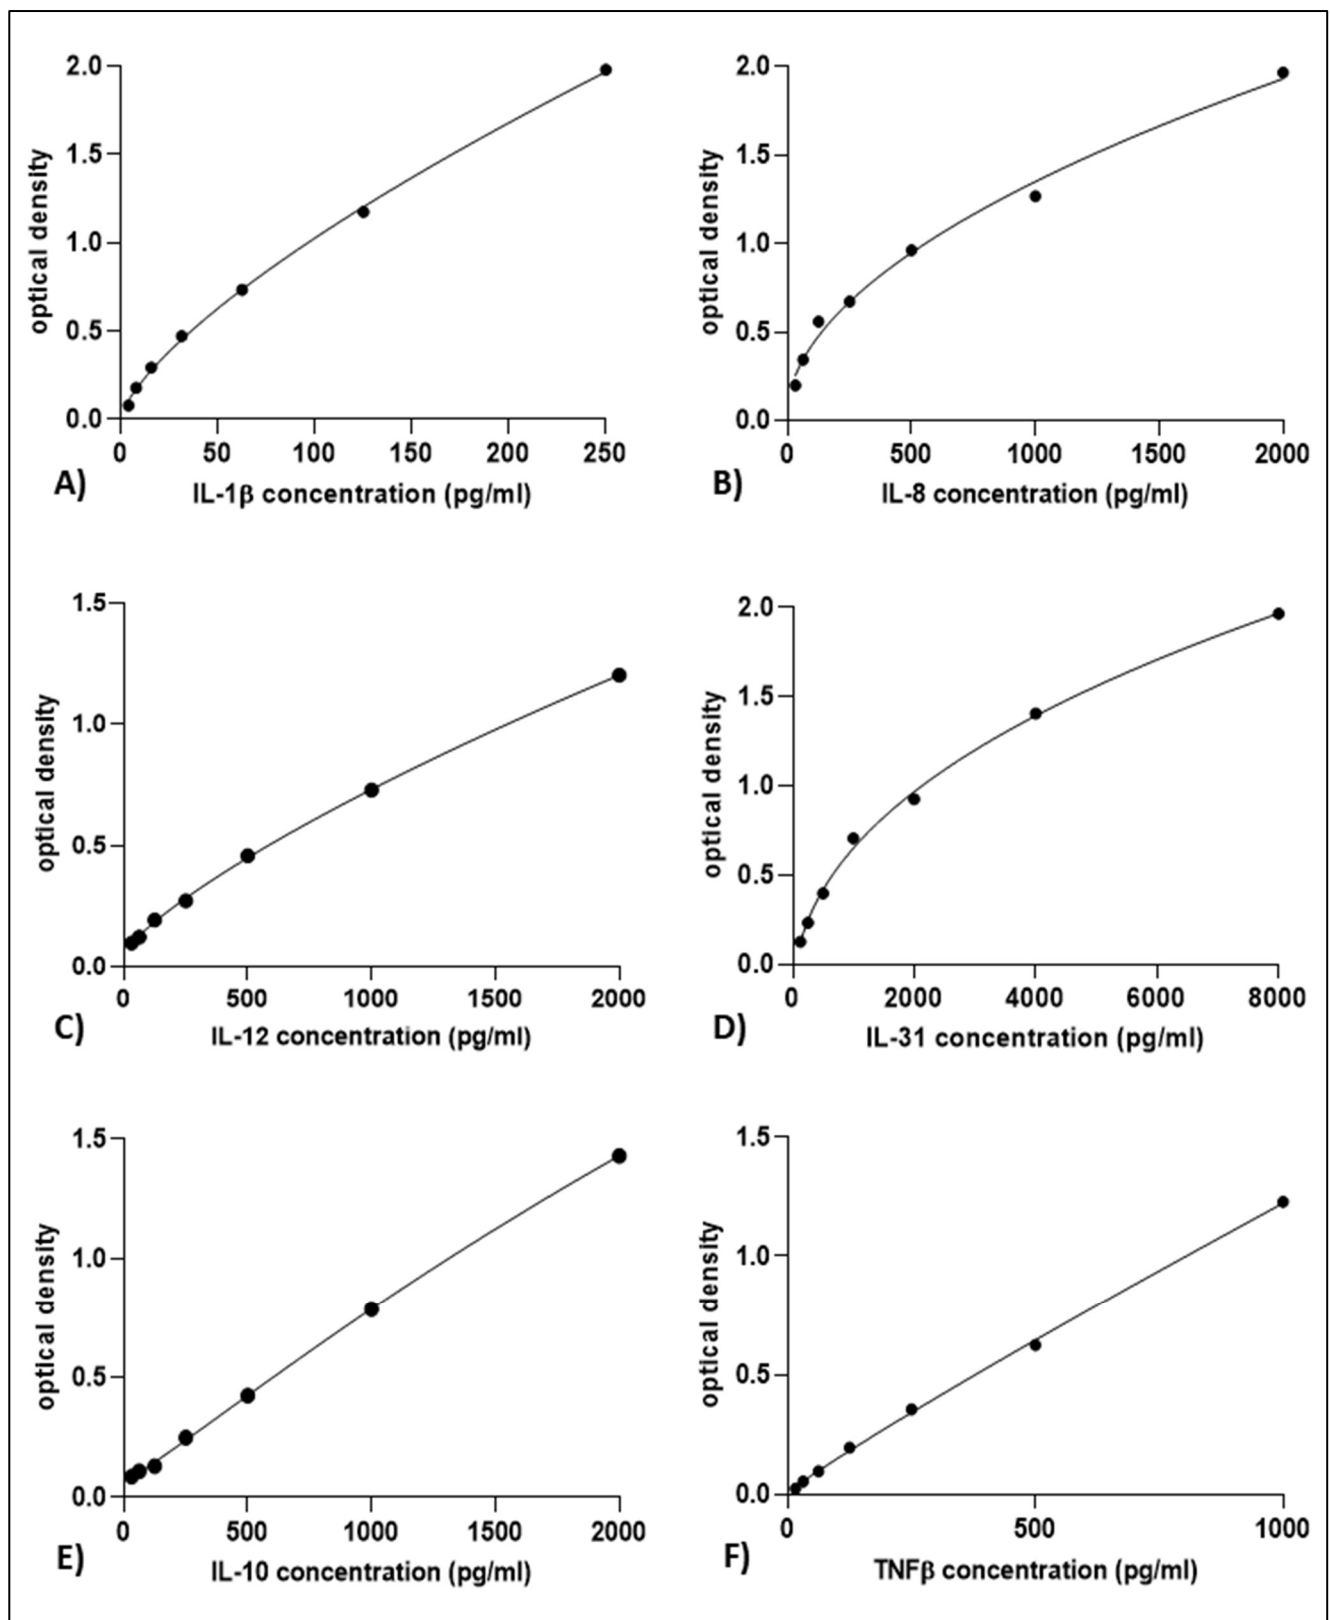

**Figure S1.** Dose-response curves of tested interleukins (pg/ml). A) IL-1 $\beta$ ; B) IL-8; C) IL-12; D) IL-31; E) IL-10; and F) TNF $\beta$ .

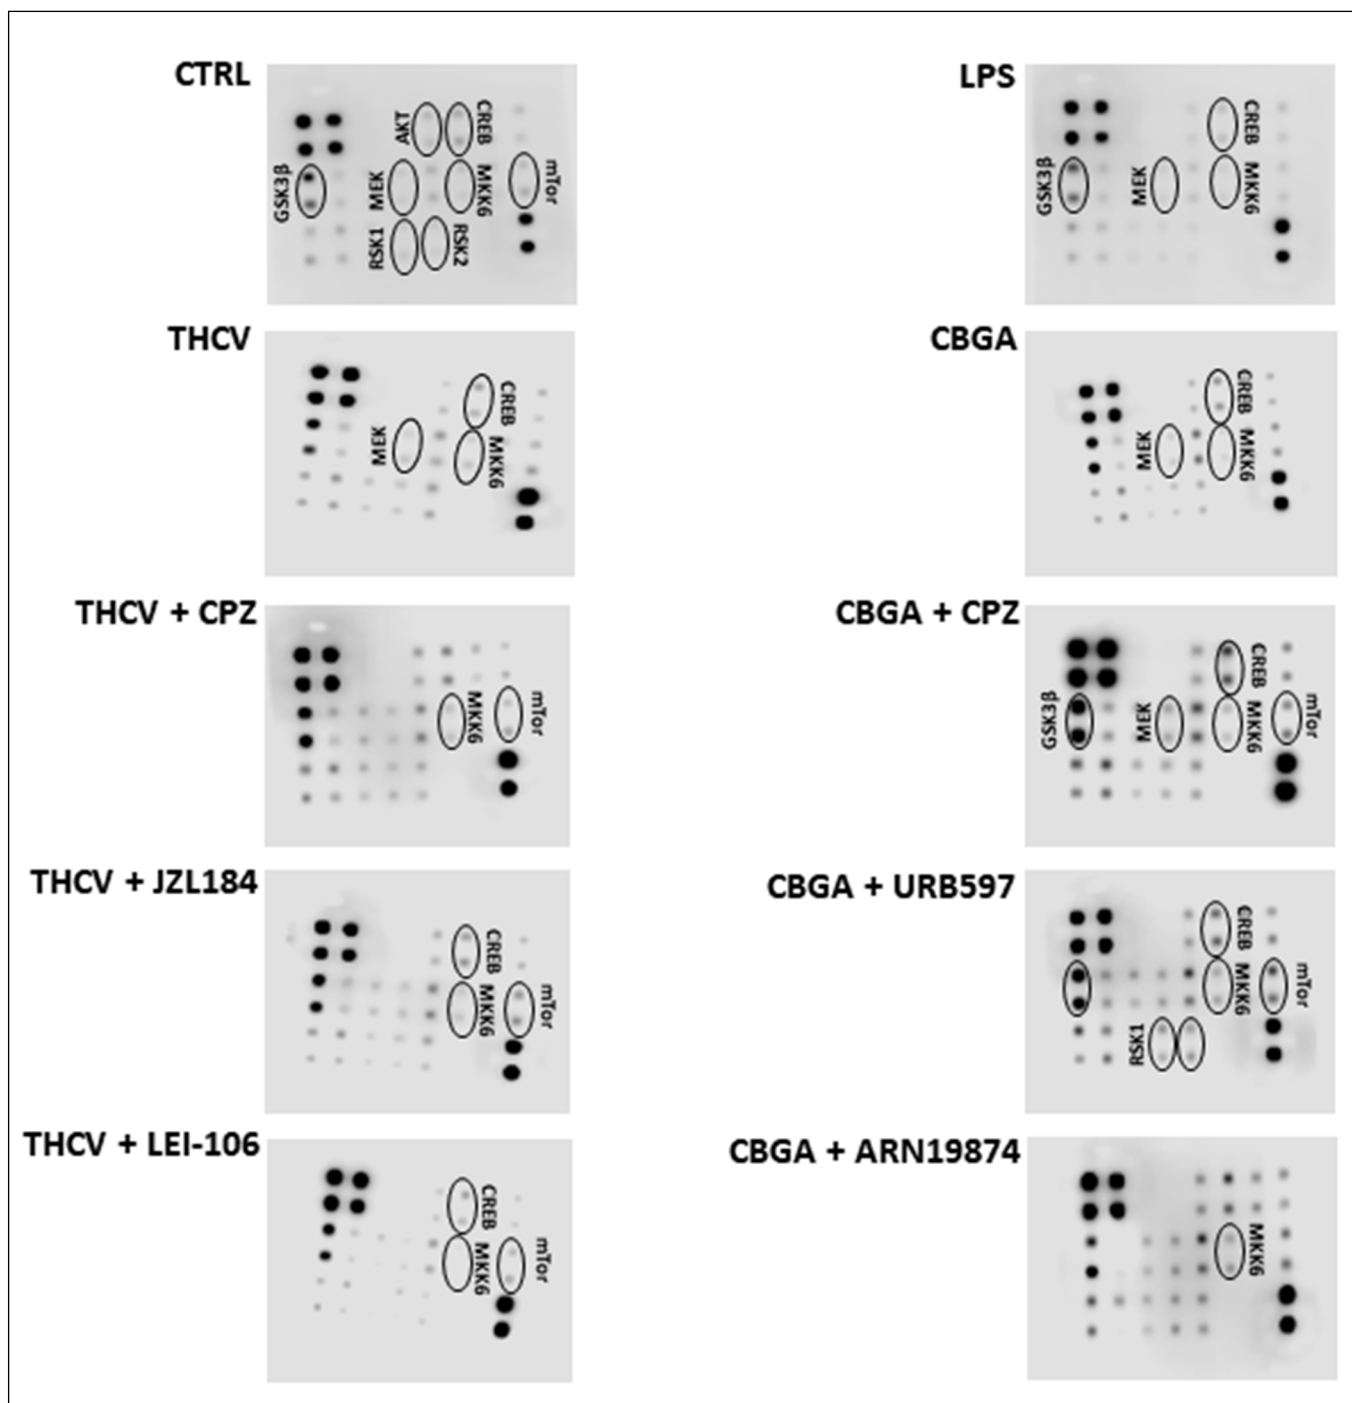

**Figure S2.** Representative images of phospho-kinase arrays for each treatment, captured by C-DiGit blot scanner. Each membrane detects the following 17 MAPKs: serine/threonine kinase 1 (AKT); cyclic adenosine monophosphate (cAMP) response element-binding protein (CREB); Glycogen synthase kinase 3  $\alpha$  (GSK3 $\alpha$ ) and  $\beta$  (GSK3 $\beta$ ); c-Jun N-terminal kinase (JNK); extracellular signal-regulated kinase (ERK1); mitogen-activated protein kinase (MEK1); Mitogen-activated protein kinase kinase 3 (MKK3) and 6 (MKK6); mitogen- and stress-activated protein kinase 2 (MSK2); Heat shock protein 27 (HSP27); mammalian target of rapamycin (mTor); p38 mitogen-activated protein kinase (p38); tumour suppressor protein (p53); p70 ribosomal S6 kinase (P70S6k), Ribosomal S6 kinase 1 (RSK1) and 2 (RSK2) (each spotted in duplicate). The pairs of dots in the upper left corner and the two dots in the lower right corner are positive controls. Black circles denote the 8 proteins (AKT, CREB, GSK3 $\beta$ , MEK, MKK6, mTor, RSK1 and RSK2) with significant variations under different experimental conditions.

**Table S1.** Representative membrane with distribution of antibodies used for MAPK array. POS = Positive Control Spot, used for normalization. NEG = Negative Control Spot, used to measure the baseline.

| Each antibody is spotted in duplicate vertically |   | A                    | B                | C                       | D                   | E                | F                | G                                              | H                 |
|--------------------------------------------------|---|----------------------|------------------|-------------------------|---------------------|------------------|------------------|------------------------------------------------|-------------------|
|                                                  | 1 | POS                  | POS              | NEG                     | NEG                 | Akt<br>(P-S473)  | CREB<br>(P-S133) | ERK1<br>(P-T202/Y204)<br>ERK2<br>(P-Y185/Y187) | GSK3a<br>(P-S21)  |
|                                                  | 2 |                      |                  |                         |                     |                  |                  |                                                |                   |
|                                                  | 3 | GSK3b<br>(P-S9)      | HSP27<br>(P-S82) | JNK<br>(P-T183)         | MEK<br>(P-S217/221) | MKK3<br>(P-S189) | MKK6<br>(P-S207) | MSK2<br>(P-S360)                               | mTOR<br>(P-S2448) |
|                                                  | 4 |                      |                  |                         |                     |                  |                  |                                                |                   |
|                                                  | 5 | p38<br>(P-T180/Y182) | P53<br>(P-S15)   | P70S6K<br>(P-T421/S424) | RSK1<br>(P-S380)    | RSK2<br>(P-S386) | NEG              | NEG                                            | POS               |
|                                                  | 6 |                      |                  |                         |                     |                  |                  |                                                |                   |
